# Supplementary material for: GFI1 regulates hair cell differentiation by acting as an off-DNA transcriptional co-activator of ATOH1, and a DNA-binding repressor
Source: PubMed Central journal article supplement (PMC9098437; doi:10.1038/s41598-022-11931-0), 2022-05-12
Supplement: 41598_2022_11931_MOESM1_ESM.pdf [file 41598_2022_11931_MOESM1_ESM.pdf]

**Jen et al., Supplementary Figures:**

**Supplementary Figure 1:** Gene ontology analysis of 672 non-hair cell genes that are up-regulated in hair cells in *Gfi1* knockout mice

**Supplementary Figure 2:** Known motif analysis of 732 *Gfi1* binding loci in hair cells.

**Supplementary Figure 3:** DNA sequences corresponding to the *Rasd2* peaks in Figure 5 that contain binding sites for ATOH1 but not GFI1 transcription factors.

**Supplementary Figure 4:** ChIP-QPCR analysis of ATOH1 and GFI1 binding to the same distal regulatory elements in the *Anxa4* and *Atoh1* genes, both of which are direct targets of ATOH1. Cochlear epithelium from neonatal *Atoh1-GFP* mice were processed for ChIP using antibodies for GFP (to pull down ATOH1-bound DNA) and GFI1, with IgG as a negative control. QPCR amplification of the DNA was carried out with previously published primers to regions of the *Atoh1* and *Anxa4* loci<sup>38</sup>

**Supplementary Figure 5:** Full images of the blots of the co-immunoprecipitation experiments in Figure 6D. The labels are the same as those in Figure 6D

**Jen et al., Supplementary Tables:**

**Supplementary Table S1:** Sheet 1 – list of 1378 hair cell enriched genes (Figure 1A). Sheet 2: 90 hair cell-enriched genes up-regulated in the GFI1 knockout cochlea and 473 hair cell-enriched genes down-regulated in the *Gfi1* knockout cochlea (Figure 1B)

**Supplementary Table S2:** Sheet 1 - List of 732 GFI1 binding loci with their closest mapped gene name. Sheet 2 - list of 3792 ATOH1 binding loci with their closest mapped gene name

**Supplementary Table S3:** Sheet 1 - List of hair cell loci with GFI1 binding sites that are either up-regulated (8 genes) or down-regulated (51 genes) in the *Gfi1* knockout. Sheet 2 - List of hair cell loci with GFI1 and ATOH1 binding sites that are either up-regulated (4 genes) or down-regulated (40 genes) in the *Gfi1* knockout. Sheet 3 - List of non-hair cell gene loci with GFI1 binding sites that are upregulated (39 genes) in the *Gfi1* knockout

**Supplementary Table S4:** Sheet 1 - List of 350 loci uniquely binding GFI1 in hair cells. Sheet 2 - List of 386 loci binding GFI1 and ATOH1 in hair cells. Sheet3 - List of 3402 loci uniquely binding ATOH1 in hair cells.

# GO analysis for 672 non-hair-cell genes upregulated in the Gfi1 knockout

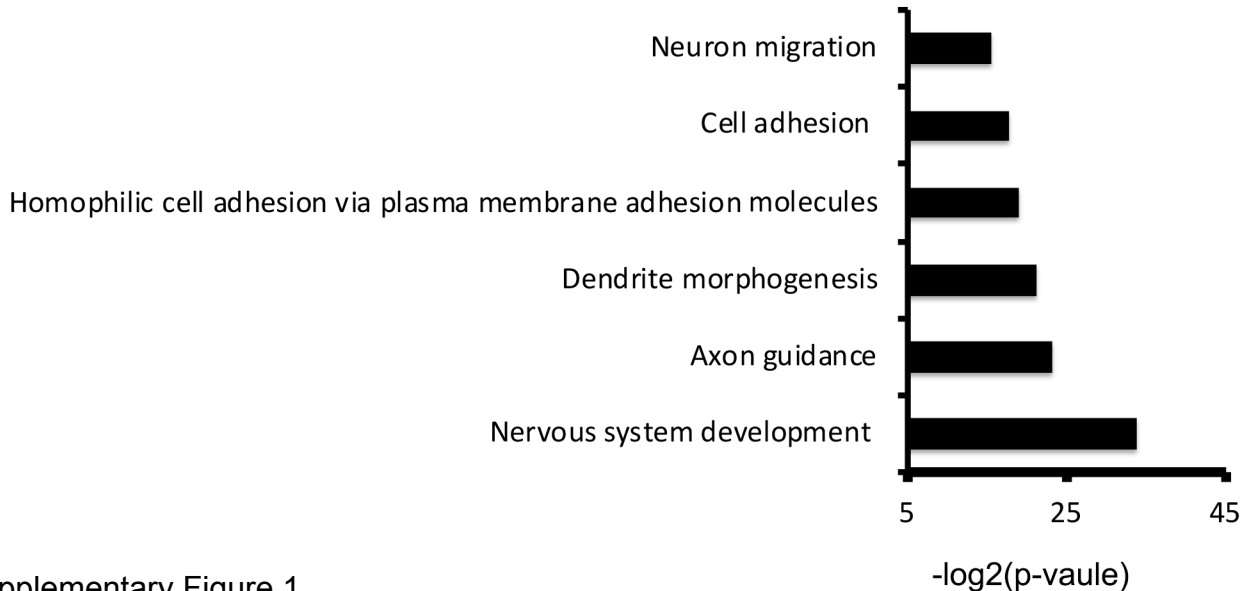

Supplementary Figure 1

# Known motif enrichment analysis for Gfi1 binding loci

| bHLH transcription factors | Motif | P-value |
|----------------------------|-------|---------|
| NeuroG2                    |       | 1e-12   |
| NeuroD1                    |       | 1e-11   |
| Atoh1                      |       | 1e-11   |
| Ascl1                      |       | 1e-10   |
| BHLH15                     |       | 1e-10   |

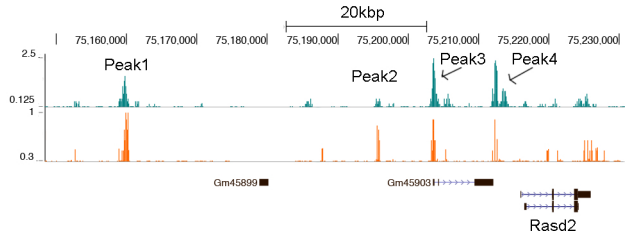

### Peak 1 (chr8:75157573-75159079)

CAAAATCAGTGGCCACTCACTAAGTGCTGTGCCTCTCCCTGGGTGTGCT  
 GCTGAGCTGAGCATGGAGGTGAGGTGTATGTCATATG99GTAAG9AACA  
 TCCAGGGAGACTTCGGTGGGACATCTCGAGGCTTCCTGGAAAGCTGTAA  
 TGTAGTCTCTATTCTCTCTGGAGGGGCTGGAGTGTGTAAGAGAGCTCA  
 CGCAGAGATAAGRACTGGAGCCTCGAGGTCCTGCTGCTCTTGTGCAT  
 ACAAAGATCCTGGCTCTATCTGGCAGCTTAAAAAATCCTGGAGGCTG  
 GGCGCAGCGACTTTCGCCAAAAGGAGCTGCTGCTCTGTCTAGGTTCC  
 AGAGGGGCATGATTTGGGAGCATGTTGCTCTCAATCATGTTCTCTTCC  
 GAGTGCCTGCTGGCAGCCAGCACTCAGCATCCACTGCTATGAC  
 GGTGACTGTGCTGGTGGAGGGGGCAGAGGGAGTGTCAACATGACTGAC  
 ATGCAAAATGCATCTGGAGCTGGAGTGCACATCATCTGGGGAGCTGGA  
 GAGCAGCTGGAGTACTATCTCCAGAGGGAGCAGTACAGAGAGTTC  
 TCTCTGAGAGATCTTGAACCTCCGCTCAATTAAAGAAAGAGTGG  
 AGGCTCAGAGAGCAGATCAGTGTGAGTGCAGCTGGAGTGGAGGACATA  
 TCAACTCTCAATCTATTATATGTAATGTTGGATAGATAGGCTATAAT  
 CCGAGTACAGAGTGGAGGAAAAGATAGAGGAGCAGATATGATCTCTC  
 ACAGCATAGCAAGCTCTAGCCAGCTGGGCAACAGGTAAGCTGTCCAAA  
 ACAAGAGACACTTGCCTAACGCTGAAAGAGCTGGCTCCACTGCTGCT  
 ACGAGTCAATGATGATGATCTTATCACTGCTCTGGATATAGACTCTC  
 ATATACATAGGTAAATGGCTCAGAGTGTATAGGAGATATCTTAGGTT  
 TCAACACTGGTGAATGGAGAGAGAGAGAGAGAGAGAGAGAGAGAGAG  
 CTTATATAGTGTGGTCCAGCTTACCTAGGAGAGAGAGAGAGAGAGAGAG  
 CCGTGTCTGGCTTGGAGTGGAGAGAGAGAGAGAGAGAGAGAGAGAGAG  
 TGTCTGAGAGAGAGAGAGAGAGAGAGAGAGAGAGAGAGAGAGAGAGAG  
 GCTGTCTTATCTGAGCTGGAGTGTGGAGTGTGGAGGAGAGAGAGAGAG  
 AGAAGCACTCTACCTCACTGAGACTGTGGTGTGGAGAGAGAGAGAGAG  
 GAGTGTGTTTGGAGCTAGGTAAGAGAGATGGCCAGTATCTCACCTGG  
 CCGTGTCTGGCTTGGTATTAAGCCAGAGAGAGAGAGAGAGAGAGAGAG  
 GCTGTCTTATCTGAGCTGGAGTGTGGAGTGTGGAGGAGAGAGAGAGAG  
 AGAAGCACTCTACCTCACTGAGACTGTGGTGTGGAGAGAGAGAGAGAG  
 GAGTGTGTTTGGAGCTAGGTAAGAGAGATGGCCAGTATCTCACCTGG  
 TCTCTGAGAGAGAGAGAGAGAGAGAGAGAGAGAGAGAGAGAGAGAGAG  
 GAACAACCCAGATAGATGCTCTGCAAGCTCTCACTGTGTGTGGAGAGAG  
 GACTCAAGCCAGCAGAGCTTGGCATAGCATCTCTGCTGGAGTGTGGAGAG  
 CTTCAATAGTGGAGAGAGAGAGAGAGAGAGAGAGAGAGAGAGAGAGAG  
 TCTCAATAGTGGAGAGAGAGAGAGAGAGAGAGAGAGAGAGAGAGAGAG  
 GAGTGTGTTTGGAGCTAGGTAAGAGAGATGGCCAGTATCTCACCTGG  
 CCGTGTCTGGCTTGGTATTAAGCCAGAGAGAGAGAGAGAGAGAGAGAG  
 A348487

### Peak 3 (chr8:75202167-75203672)

ACATCGAGTCAATCTTTTATCTGGAGAGTGGGTGGCTCTAAAGGTCA  
 TCTCAAGAAAGAGTTCGTGATCAGTCAAGTCAAGTCCAGCTTGATGT  
 CTGAGTGGACACAGACATGGCAGATGATGACATCGAGAGAGAGTGGT  
 ATTCAGCTCTGGTGGAGAGAGAGAGAGAGAGAGAGAGAGAGAGAGAG  
 GATTCCTTCAAGGCTAAGACACATCATGAGGACATGGGCTGGCTGG  
 AGGGTTTCAAGGATGAGAGAGAGAGAGAGAGAGAGAGAGAGAGAGAG  
 TTTCCTTTTGGAGGAGGTTTCAATACAGCCAGGAGAGAGAGAGAGAG  
 ATATAAGTGGAGGATGCTGATGATCTGATGCTCTGCTGCTGCTGCTG  
 CCAAGTGTGAAATACAGATGTTGGGACATGCTTAAAGTATGTCGTC  
 CTGGAGTGGACATGACATCATGAGCAGGACATCACTAGCCATGAGCCATG  
 CAGCAGACATCTGTTGTTTCTTCTTCTTCTTCTTCTTCTTCTTCTTCT  
 TATAGTCTTGGAGTCAAGTAGCTAAGAGAGAGATTTGGTGGTGT  
 GGGAGTGGATGCTCTCTCTGGAGTGGTGGACAGGTAGAGAGTGGAG  
 GATGGATGCTGCTGAGGGGCAATGTTCTCATATAGACTGTAGAGAC  
 CAGCAGACATCTGGAGAGAGAGAGAGAGAGAGAGAGAGAGAGAGAG  
 GCTTCAAGCTTGGAGAGAGAGAGAGAGAGAGAGAGAGAGAGAGAGAG  
 GGGGAGATGACATCTCAAGCAGAGAGAGTCTCTGGAGAGTCTGGC  
 TGGACTCAGGCAATTAATTAATCAACAGCCTTAGACACTGTACTCCGGGG  
 CCGTGTCTGGCTTGGTATTAAGCCAGAGAGAGAGAGAGAGAGAGAGAG  
 GCTGTCTTATCTGAGCTGGAGTGTGGAGTGTGGAGGAGAGAGAGAGAG  
 AGAAGCACTCTACCTCACTGAGACTGTGGTGTGGAGAGAGAGAGAGAG  
 GAGTGTGTTTGGAGCTAGGTAAGAGAGATGGCCAGTATCTCACCTGG  
 TCTCTGAGAGAGAGAGAGAGAGAGAGAGAGAGAGAGAGAGAGAGAGAG  
 GAACAACCCAGATAGATGCTCTGCAAGCTCTCACTGTGTGTGGAGAGAG  
 GACTCAAGCCAGCAGAGCTTGGCATAGCATCTCTGCTGGAGTGTGGAGAG  
 CTTCAATAGTGGAGAGAGAGAGAGAGAGAGAGAGAGAGAGAGAGAGAG  
 TCTCAATAGTGGAGAGAGAGAGAGAGAGAGAGAGAGAGAGAGAGAGAG  
 GAGTGTGTTTGGAGCTAGGTAAGAGAGATGGCCAGTATCTCACCTGG  
 CCGTGTCTGGCTTGGTATTAAGCCAGAGAGAGAGAGAGAGAGAGAGAG  
 A348487

| Motif ID | AH ID | Sequence Name | Strand | Start | End  | p-value  | q-value | Matched Sequence |
|----------|-------|---------------|--------|-------|------|----------|---------|------------------|
| MA0461.1 | Anoh1 | mm10_dna      | +      | 1005  | 1012 | 4.87e-05 | 0.141   | CAGCTGGT         |

| Motif ID | AH ID | Sequence Name | Strand | Start | End  | p-value  | q-value | Matched Sequence |
|----------|-------|---------------|--------|-------|------|----------|---------|------------------|
| MA0461.1 | Anoh1 | mm10_dna      | +      | 1330  | 1337 | 2.2e-05  | 0.0634  | CAGATGGC         |
| MA0461.1 | Anoh1 | mm10_dna      | -      | 755   | 762  | 4.87e-05 | 0.0783  | CAGATGGT         |
| MA0461.2 | Anoh1 | mm10_dna      | -      | 755   | 764  | 5.71e-05 | 0.169   | AACAGATGGT       |

### Peak 2 (chr8:75194608-75195109)

TGTTTGTGGCTCATGTCTCTGCTGCACATGCAACAAGGAGATGTTGG  
 CAAATAGCTTCCAGGGAGATATACTACTCTCAGCCGCTCTTCAAGCAGG  
 CACAGCTGTAGGCTCAGCCCTCCTCACTGCTGCTGCTTCAAGCCACCA  
 CCGTCCACCTCTCCCTGCGCCGCCCCCCCCCCCCAGGCTCTCTCTTGG  
 AGATGAGTCAACACCTCTGATCACTCAGCCACTCACTGCTCTTCT  
 CTGACACTGGAGAGAGAGAGAGAGAGAGAGAGAGAGAGAGAGAGAGAG  
 GAGTGTGTTTGGAGCTAGGTAAGAGAGATGGCCAGTATCTCACCTGG  
 CCGTGTCTGGCTTGGTATTAAGCCAGAGAGAGAGAGAGAGAGAGAGAG  
 TGTCTGAGAGAGAGAGAGAGAGAGAGAGAGAGAGAGAGAGAGAGAGAG  
 GAACAACCCAGATAGATGCTCTGCAAGCTCTCACTGTGTGTGGAGAGAG  
 GACTCAAGCCAGCAGAGCTTGGCATAGCATCTCTGCTGGAGTGTGGAGAG  
 CTTCAATAGTGGAGAGAGAGAGAGAGAGAGAGAGAGAGAGAGAGAGAG  
 TCTCAATAGTGGAGAGAGAGAGAGAGAGAGAGAGAGAGAGAGAGAGAG  
 GAGTGTGTTTGGAGCTAGGTAAGAGAGATGGCCAGTATCTCACCTGG  
 CCGTGTCTGGCTTGGTATTAAGCCAGAGAGAGAGAGAGAGAGAGAGAG  
 A348487

### Peak 4 (chr8:7521114-75212130)

TATATCACTGGAGAGCTGCTCTTTCTCAAGGAAATGGAGAAACAGTA  
 GATGGGGGGGGGGGAAAGAGGATGATCCGAGAGGGGGTATGAGAGGTTT  
 GGTGGGGAGTGGAGCTGTATTGGAAATGATTTGATGAGAGAGAGATAAA  
 TAAATTAAGTGTGATGTTTAAAGAGAGAGAGAGAGAGAGAGAGAGAGAG  
 GAGGAGGCTTGGAGATACAAAGAGAGAGAGAGAGAGAGAGAGAGAGAG  
 ATCCGAGAGAGACTGAGTGTAGGAGAGAGAGAGAGAGAGAGAGAGAGAG  
 TGGGCTCATGAGTGTGGTGGATGTGGAGAGATTTCTGTGACCTGGC  
 TGGTGGTGGAGAGAGAGAGAGAGAGAGAGAGAGAGAGAGAGAGAGAGAG  
 GTCAGGTGGGTTCCAGCCAGGAGAGAGAGAGAGAGAGAGAGAGAGAGAG  
 TGTGGATGGATGAGTCACTGGAGTGTGGAGAGAGAGAGAGAGAGAGAGAG  
 TGGGCTCATGAGTGTGGTGGATGTGGAGAGATTTCTGTGACCTGGC  
 TGGTGGTGGAGAGAGAGAGAGAGAGAGAGAGAGAGAGAGAGAGAGAGAG  
 CCGTCCACCTCCAGGCTGGAGTGGAGAGATTTCTGTGACCTGGC  
 TCCCGAGCTCAGCCTCTGAGCTGAGGACAGTCTGCTGCTGCTCTTATTA  
 CTGCGAGCTCAGGAGCTTCCGCTGAGCCGAGCTGAGCAAGCTCCCGGG  
 TAAAGCTCTCTGAGGAGAGAGAGAGAGAGAGAGAGAGAGAGAGAGAGAG  
 TAGGATTTGGCATTTTGGTCACTGGTGGATCTGGGACAGCTCTTAGAG  
 CTACATTTAGAGCTTAGACTTAGGCTTTAAAGCCGAGAGAGAGAGAGAGAG  
 CAACACACTCTTGGCTGGCCCTCCGACATCCGATGCACTCTCTCTCAT  
 ATGATCTCTGGAGAGATGAGACTTCTGCTGCTGCTGCTGCTGCTGCTGCT  
 ATTTCTGTGTTTAAAGCCAGGAGCAGTATGAGCATTTTGTACTCAAT  
 GACTTGGCAGTATGTA

| Motif ID | AH ID        | Sequence Name | Strand | Start | End | p-value  | q-value | Matched Sequence |
|----------|--------------|---------------|--------|-------|-----|----------|---------|------------------|
| MA1467.1 | ATOH1(vaz.2) | mm10_dna      | +      | 264   | 273 | 5.81e-05 | 0.0539  | AGCTGCTGTC       |

Supplementary Figure 4

Atoh1

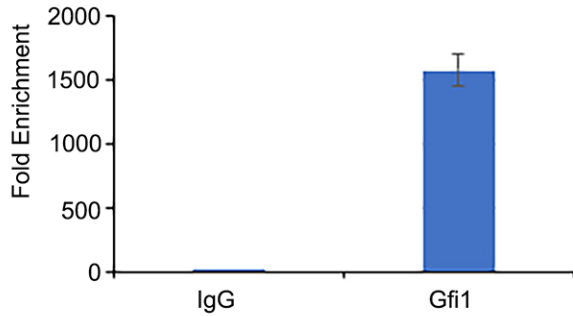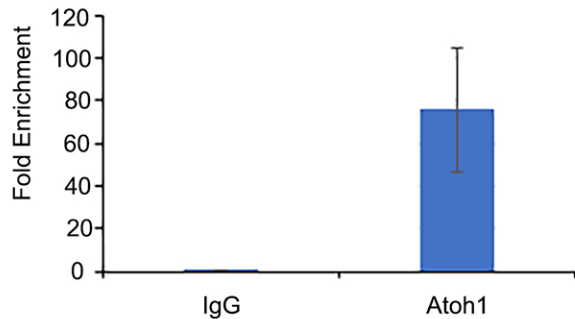

Anxa4

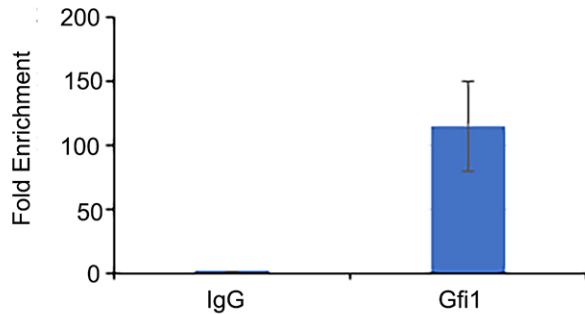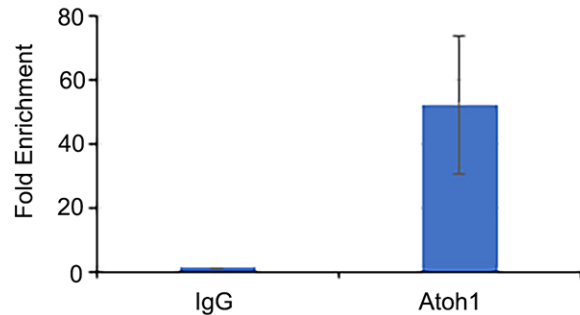

|               | IP:GFP    |   |   |   |              |   |   |   |
|---------------|-----------|---|---|---|--------------|---|---|---|
|               | With EtBr |   |   |   | Without EtBr |   |   |   |
| GFP Atoh1     | +         | + | + | + | +            | + | + | + |
| Flag          | +         | + | - | - | +            | + | - | - |
| tdTomato      | +         | - | + | - | +            | - | + | - |
| Gfi1 tdTomato | -         | + | - | + | -            | + | - | + |
| Flag Tcf3     | -         | - | + | + | -            | - | + | + |

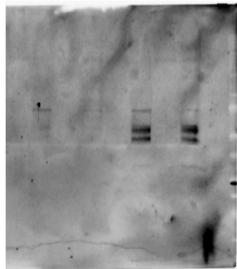

IB: Gfi1

|               | IP:GFP    |   |   |   |              |   |   |   |
|---------------|-----------|---|---|---|--------------|---|---|---|
|               | With EtBr |   |   |   | Without EtBr |   |   |   |
| GFP Atoh1     | +         | + | + | + | +            | + | + | + |
| Flag          | +         | + | - | - | +            | + | - | - |
| tdTomato      | +         | - | + | - | +            | - | + | - |
| Gfi1 tdTomato | -         | + | - | + | -            | + | - | + |
| Flag Tcf3     | -         | - | + | + | -            | - | + | + |

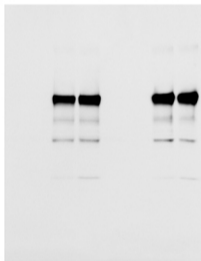

IB: Flag

|               | IP:GFP    |   |   |   |              |   |   |   |
|---------------|-----------|---|---|---|--------------|---|---|---|
|               | With EtBr |   |   |   | Without EtBr |   |   |   |
| GFP Atoh1     | +         | + | + | + | +            | + | + | + |
| Flag          | +         | + | - | - | +            | + | - | - |
| tdTomato      | +         | - | + | - | +            | - | + | - |
| Gfi1 tdTomato | -         | + | - | + | -            | + | - | + |
| Flag Tcf3     | -         | - | + | + | -            | - | + | + |

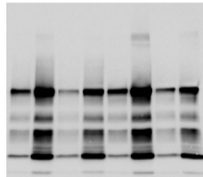

IB: GFP

**Supplementary Figure 5**
